# Supplementary material
Source: PubMed Central journal article supplement (PMC10355144)
Supplement: NIHMS97503-supplement-supplement_1.pdf [file NIHMS97503-supplement-supplement_1.pdf]

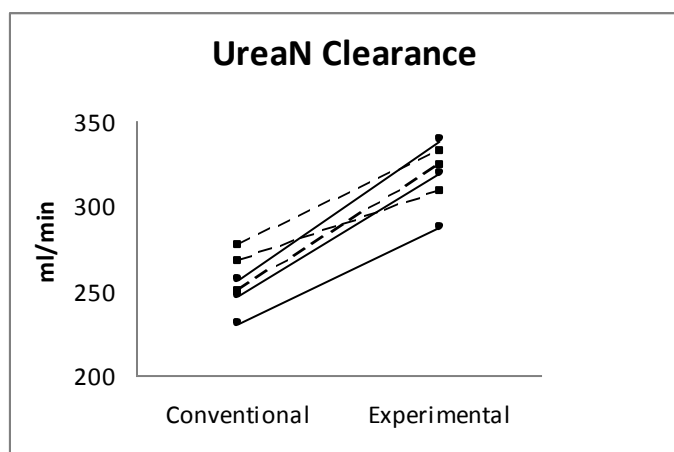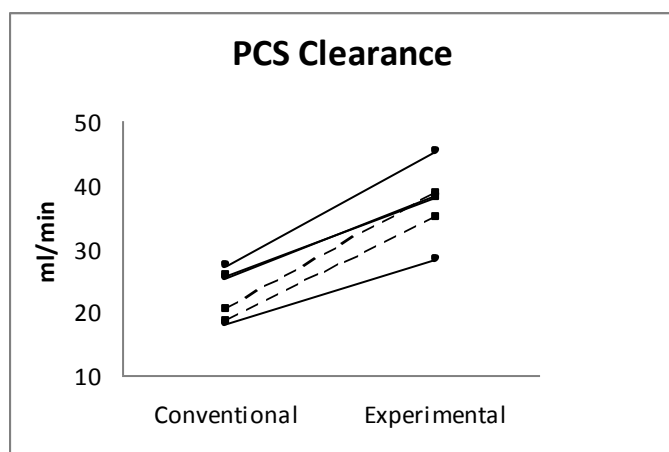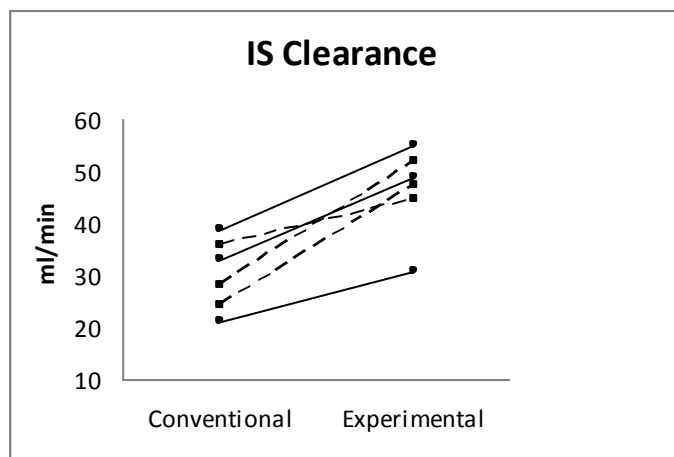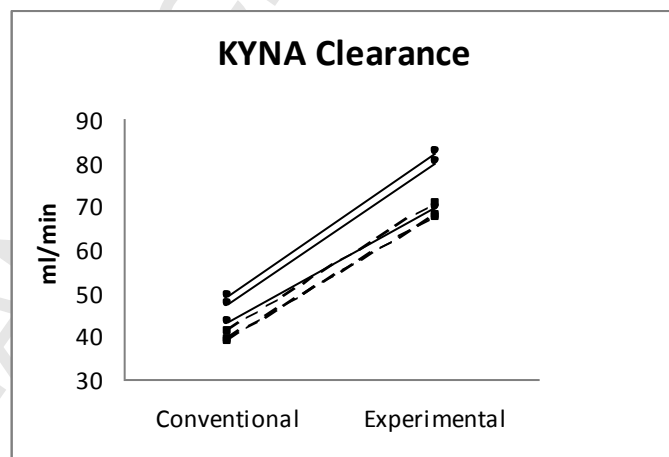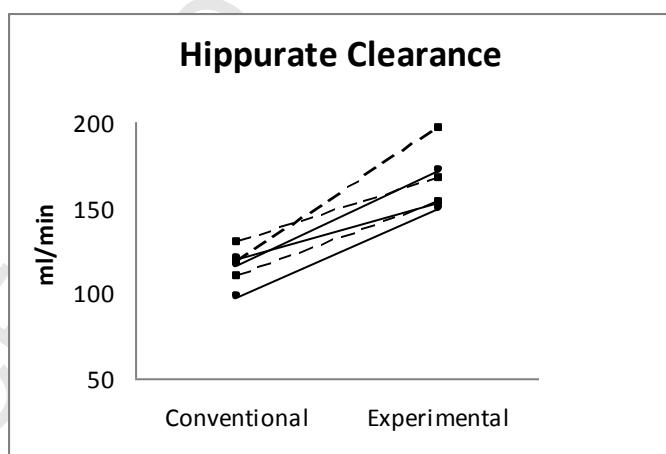

| Essential            | MW<br>(g/mol) | Conventional Dialysis           |                                  |                    |                 | Experimental Dialysis           |                                  |                    |                 |
|----------------------|---------------|---------------------------------|----------------------------------|--------------------|-----------------|---------------------------------|----------------------------------|--------------------|-----------------|
|                      |               | Plasma pre<br>( $\mu\text{M}$ ) | Plasma post<br>( $\mu\text{M}$ ) | Reduction<br>ratio | Removed<br>(mg) | Plasma pre<br>( $\mu\text{M}$ ) | Plasma post<br>( $\mu\text{M}$ ) | Reduction<br>ratio | Removed<br>(mg) |
| Lysine               | 146.19        | 179 $\pm$ 29                    | 102 $\pm$ 11                     | 0.42 $\pm$ 0.10    | 587 $\pm$ 93    | 192 $\pm$ 55                    | 94 $\pm$ 22                      | 0.49 $\pm$ 0.13    | 805 $\pm$ 244   |
| Valine               | 117.15        | 174 $\pm$ 32                    | 101 $\pm$ 22                     | 0.42 $\pm$ 0.10    | 416 $\pm$ 117   | 207 $\pm$ 58                    | 104 $\pm$ 47                     | 0.50 $\pm$ 0.13    | 627 $\pm$ 288   |
| Leucine              | 131.18        | 111 $\pm$ 23                    | 82 $\pm$ 15                      | 0.24 $\pm$ 0.14    | 412 $\pm$ 92    | 131 $\pm$ 33                    | 83 $\pm$ 33                      | 0.37 $\pm$ 0.16    | 664 $\pm$ 252   |
| Phenylalanine        | 165.19        | 63 $\pm$ 11                     | 49 $\pm$ 7                       | 0.21 $\pm$ 0.07    | 332 $\pm$ 101   | 69 $\pm$ 18                     | 47 $\pm$ 13                      | 0.32 $\pm$ 0.12    | 468 $\pm$ 241   |
| Threonine            | 119.12        | 110 $\pm$ 37                    | 65 $\pm$ 18                      | 0.39 $\pm$ 0.09    | 276 $\pm$ 97    | 110 $\pm$ 32                    | 59 $\pm$ 18                      | 0.45 $\pm$ 0.12    | 335 $\pm$ 129   |
| Isoleucine           | 131.18        | 63 $\pm$ 12                     | 43 $\pm$ 15                      | 0.33 $\pm$ 0.16    | 182 $\pm$ 52    | 72 $\pm$ 23                     | 45 $\pm$ 23                      | 0.39 $\pm$ 0.17    | 258 $\pm$ 105   |
| Methionine           | 149.21        | 26 $\pm$ 6                      | 17 $\pm$ 3                       | 0.33 $\pm$ 0.23    | 25 $\pm$ 43     | 28 $\pm$ 10                     | 15 $\pm$ 6                       | 0.41 $\pm$ 0.27    | 84 $\pm$ 71     |
| Tryptophan           | 204.23        | 11 $\pm$ 3                      | 16 $\pm$ 4                       | -0.49 $\pm$ 0.20   | nd              | 12 $\pm$ 5                      | 16 $\pm$ 6                       | -0.39 $\pm$ 0.10   | nd              |
| <b>Non Essential</b> |               |                                 |                                  |                    |                 |                                 |                                  |                    |                 |
| Glutamine            | 146.15        | 591 $\pm$ 68                    | 389 $\pm$ 83                     | 0.33 $\pm$ 0.08    | 2112 $\pm$ 402  | 575 $\pm$ 55                    | 356 $\pm$ 84                     | 0.34 $\pm$ 0.13    | 2444 $\pm$ 525  |
| Glycine              | 75.07         | 317 $\pm$ 119                   | 218 $\pm$ 78                     | 0.30 $\pm$ 0.09    | 564 $\pm$ 162   | 294 $\pm$ 85                    | 186 $\pm$ 63                     | 0.37 $\pm$ 0.06    | 620 $\pm$ 196   |
| Alanine              | 89.1          | 331 $\pm$ 74                    | 179 $\pm$ 35                     | 0.45 $\pm$ 0.11    | 592 $\pm$ 191   | 343 $\pm$ 92                    | 160 $\pm$ 45                     | 0.53 $\pm$ 0.07    | 738 $\pm$ 297   |
| Proline              | 115.13        | 226 $\pm$ 32                    | 131 $\pm$ 21                     | 0.41 $\pm$ 0.12    | 565 $\pm$ 143   | 253 $\pm$ 48                    | 129 $\pm$ 35                     | 0.50 $\pm$ 0.07    | 732 $\pm$ 302   |
| Cystine              | 121.16        | 87 $\pm$ 33                     | 25 $\pm$ 9                       | 0.71 $\pm$ 0.06    | 200 $\pm$ 52    | 98 $\pm$ 27                     | 19 $\pm$ 7                       | 0.81 $\pm$ 0.07    | 257 $\pm$ 59    |
| Serine               | 105.09        | 74 $\pm$ 18                     | 52 $\pm$ 17                      | 0.30 $\pm$ 0.10    | 215 $\pm$ 45    | 79 $\pm$ 26                     | 49 $\pm$ 18                      | 0.35 $\pm$ 0.18    | 312 $\pm$ 141   |
| Glutamic acid        | 147.13        | 67 $\pm$ 21                     | 78 $\pm$ 22                      | -0.20 $\pm$ 0.26   | 285 $\pm$ 183   | 84 $\pm$ 21                     | 87 $\pm$ 26                      | -0.04 $\pm$ 0.21   | 379 $\pm$ 204   |
| Arginine             | 174.2         | 84 $\pm$ 14                     | 46 $\pm$ 13                      | 0.45 $\pm$ 0.14    | 293 $\pm$ 90    | 90 $\pm$ 24                     | 40 $\pm$ 8                       | 0.54 $\pm$ 0.13    | 370 $\pm$ 150   |
| Histidine            | 155.16        | 79 $\pm$ 11                     | 45 $\pm$ 3                       | 0.41 $\pm$ 0.09    | 264 $\pm$ 25    | 83 $\pm$ 16                     | 45 $\pm$ 8                       | 0.45 $\pm$ 0.11    | 334 $\pm$ 77    |
| Tyrosine             | 181.19        | 42 $\pm$ 10                     | 29 $\pm$ 7                       | 0.30 $\pm$ 0.12    | 237 $\pm$ 73    | 47 $\pm$ 20                     | 28 $\pm$ 9                       | 0.37 $\pm$ 0.12    | 292 $\pm$ 163   |
| Asparagine           | 132.12        | 58 $\pm$ 17                     | 37 $\pm$ 10                      | 0.36 $\pm$ 0.13    | 82 $\pm$ 68     | 56 $\pm$ 18                     | 33 $\pm$ 12                      | 0.41 $\pm$ 0.15    | 81 $\pm$ 67     |
| Aspartic acid        | 133.1         | 12 $\pm$ 9                      | 5 $\pm$ 4                        | nc                 | 47 $\pm$ 9      | 15 $\pm$ 7                      | 5 $\pm$ 2                        | nc                 | 86 $\pm$ 45     |

nd, below limit of measurement; nc, incalculable due to undetectable pre values in one subject
